# Supplementary material
Source: PubMed Central journal article supplement (PMC6989799)
Supplement: JB.00691-19-s0001.pdf [file JB.00691-19-s0001.pdf]

1 **References**

- 2 1. Avery OT, Macleod CM, McCarty M. 1944. Studies on the chemical nature of the  
3 substance inducing transformation of pneumococcal types: induction of transformation  
4 by a desoxyribonucleic acid fraction isolated from pneumococcus type III. *J Exp Med*  
5 79:137-58.
- 6 2. Bai Y, Yang J, Eisele LE, Underwood AJ, Koestler BJ, Waters CM, Metzger DW, Bai G.  
7 2013. Two DHH subfamily 1 proteins in *Streptococcus pneumoniae* possess cyclic di-  
8 AMP phosphodiesterase activity and affect bacterial growth and virulence. *J Bacteriol*  
9 195:5123-32.
- 10 3. Zarrella TM, Metzger DW, Bai G. 2018. Stress suppressor screening leads to detection  
11 of regulation of cyclic di-AMP homeostasis by a Trk family effector protein in  
12 *Streptococcus pneumoniae*. *J Bacteriol* doi:10.1128/JB.00045-18.
- 13 4. Macrina FL, Tobian JA, Jones KR, Evans RP, Clewell DB. 1982. A cloning vector able to  
14 replicate in *Escherichia coli* and *Streptococcus sanguis*. *Gene* 19:345-53.
- 15 5. Halfmann A, Hakenbeck R, Bruckner R. 2007. A new integrative reporter plasmid for  
16 *Streptococcus pneumoniae*. *FEMS Microbiol Lett* 268:217-24.

17

18

19 **Table S1 Differentially expressed genes between WT and  $\Delta pde1\Delta pde2$  determined from**  
 20 **RNA-Seq analysis\*.**

| <b>D39<br/>Annotation</b> | <b>Fold<br/>change<br/>(Log<sub>2</sub>)</b> | <b>Description</b>                                              |
|---------------------------|----------------------------------------------|-----------------------------------------------------------------|
| SPD_1529                  | -1.80                                        | Mobile element protein                                          |
| SPD_0058                  | -1.40                                        | <i>purD</i> , Phosphoribosylamine-glycine ligase                |
| SPD_0684                  | -1.40                                        | BioY family biotin synthase                                     |
| SPD_0913                  | -1.20                                        | Hypothetical protein                                            |
| SPD_1414                  | -1.10                                        | Oxalate/formate antiporter                                      |
| SPD_0267                  | -1.10                                        | Xanthine/uracil permease                                        |
| SPD_2068                  | -1.10                                        | <i>htrA</i> , Serine protease                                   |
| SPD_1526                  | -1.00                                        | ABC transporter                                                 |
| SPD_1525                  | -1.00                                        | ABC transporter ATP-binding protein                             |
| SPD_1087                  | -1.00                                        | <i>fhs</i> , Formate-tetrahydrofolate ligase                    |
| SPD_1589                  | -1.00                                        | Lipoprotein                                                     |
| SPD_1644                  | -0.90                                        | Hypothetical protein                                            |
| SPD_1506                  | -0.90                                        | Acetyl xylan esterase                                           |
| SPD_1590                  | -0.90                                        | General stress protein 24                                       |
| SPD_1588                  | -0.90                                        | Hypothetical protein                                            |
| SPD_1152                  | -0.90                                        | <i>fld</i> , Flavodoxin                                         |
| SPD_1524                  | -0.80                                        | GntR transcriptional regulator                                  |
| SPD_1375                  | -0.80                                        | NADPH-dependent FMN reductase                                   |
| SPD_2069                  | -0.80                                        | <i>spoJ</i> , Chromosome partitioning protein                   |
| SPD_1100                  | -0.80                                        | <i>zwf</i> , Glucose-6-phosphate 1-dehydrogenase                |
| SPD_2054                  | 0.81                                         | <i>recF</i> , DNA replication and repair protein                |
| SPD_1620                  | 0.82                                         | Glycosyl transferase                                            |
| SPD_1619                  | 0.83                                         | Capsular polysaccharide biosynthesis protein                    |
| SPD_1170                  | 0.83                                         | ABC transporter, oligopeptide-binding protein                   |
| SPD_0594                  | 0.84                                         | Hypothetical protein                                            |
| SPD_1868                  | 0.85                                         | <i>tgt</i> , queuine tRNA-rubosyltransferase                    |
| SPD_1357                  | 0.85                                         | <i>aliB</i> , ABC transporter, oligopeptide-binding protein     |
| SPD_0472                  | 0.93                                         | <i>blpA</i> , Bacteriocin ABC transporter ATP-binding protein   |
| SPD_0248                  | 0.93                                         | <i>glmS</i> , Glucosamine-fructose-6-phosphate aminotransferase |
| SPD_1587                  | 0.95                                         | Transcriptional activator                                       |
| SPD_1341                  | 0.97                                         | <i>atpE</i> , ATP synthase F <sub>0</sub> , C subunit           |
| SPD_1430                  | 0.97                                         | <i>fer</i> , Ferredoxin                                         |
| SPD_0459                  | 0.97                                         | <i>grpE</i> , Heat shock protein/molecular chaperone            |
| SPD_0817                  | 0.98                                         | CAAX amino terminal protease family protein                     |
| SPD_1828                  | 0.99                                         | Hypothetical protein                                            |
| SPD_0460                  | 0.99                                         | <i>dnaK</i> , Heat shock protein/molecular chaperone            |
| SPD_0890                  | 1.00                                         | <i>phtE</i> , Histidine triad protein E precursor               |
| SPD_0608                  | 1.01                                         | <i>pyrF</i> , Orotidine 5'-phosphate decarboxylase              |

|                         |      |                                                               |
|-------------------------|------|---------------------------------------------------------------|
| SPD_1499                | 1.01 | <i>nanB</i> , Sialidase B precursor                           |
| SPD_0458                | 1.04 | <i>hrcA</i> , Heat-inducible transcription repressor          |
| SPD_1502                | 1.06 | ABC transporter, multiple sugar binding protein               |
| SPD_0609                | 1.09 | <i>pyrE</i> , Orotate phosphoribosyltransferase               |
| intergenic<br>SPD_1179/ |      | Hypothetical protein                                          |
| SPD_1180                | 1.11 |                                                               |
| SPD_0470                | 1.12 | <i>blpC</i> , Peptide pheromone                               |
| SPD_0029                | 1.13 | <i>radA</i> , DNA repair protein                              |
| SPD_1498                | 1.13 | Oxidoreductase                                                |
| SPD_0994                | 1.13 | <i>ribF</i> , Riboflavin biosynthesis protein                 |
| SPD_0048                | 1.16 | Hypothetical protein                                          |
| SPD_1618                | 1.16 | Hypothetical protein                                          |
| SPD_0028                | 1.17 | Phosphoglycerate mutase family protein                        |
| intergenic<br>SPD_0844/ |      | Hypothetical protein                                          |
| SPD_0845                | 1.21 |                                                               |
| SPD_0027                | 1.23 | <i>dut</i> , Deoxyuridine 5'-triphosphate nucleotidohydrolase |
| SPD_0591                | 1.23 | Hypothetical protein                                          |
| SPD_1380                | 1.26 | Hypothetical protein                                          |
| SPD_0308                | 1.27 | <i>clpL</i> , ATP-dependent Clp protease ATP-binding subunit  |
| SPD_1381                | 1.29 | <i>def-2</i> , Polypeptide deformylase                        |
| SPD_0845                | 1.38 | ABC transporter, ATP-binding protein                          |
| SPD_1740                | 1.40 | <i>cinA</i> , Competence nicotinamide-nucleotide amidase      |
| SPD_0471                | 1.40 | <i>blpB</i> , ABC transporter of <i>blpC</i>                  |
| SPD_1965                | 1.44 | <i>pcpA</i> , Choline binding protein                         |
| SPD_0846                | 1.45 | ABC transport permease protein                                |
| SPD_1842                | 1.48 | <i>araD</i> , L-ribulose-5-phosphate 4-epimerase              |
| SPD_1503                | 1.49 | Hypothetical protein                                          |
| SPD_1593                | 1.55 | <i>ccIA</i> , Type IV prepilin peptidase                      |
| SPD_1633                | 1.57 | <i>galT-2</i> , Galactose-1-phosphate uridylyltransferase     |
| SPD_0249                | 1.58 | Hypothetical protein                                          |
| SPD_1841                | 1.58 | BglG family transcriptional regulator                         |
| SPD_1678                | 1.59 | <i>agaN</i> , Alpha-galactosidase                             |
| SPD_1632                | 1.65 | Acyl-CoA thioesterase                                         |
| SPD_1676                | 1.66 | <i>raff</i> , Sugar ABC transporter permease protein          |
| SPD_1984                | 1.69 | Hypersensitive-induced reaction protein 4                     |
| SPD_0392                | 1.71 | Hypothetical protein                                          |
| intergenic<br>SPD_0393/ |      | Hypothetical protein                                          |
| SPD_0392                | 1.73 |                                                               |
| SPD_1634                | 1.74 | <i>galK</i> , Galactokinase                                   |
| SPD_0035-<br>36         | 1.80 | <i>ccs16</i> , Competence-induced protein                     |
| SPD_1675                | 1.84 | <i>rafG</i> , Sugar ABC transporter permease                  |
| SPD_1673                | 1.85 | <i>gtfA</i> , Sucrose phosphorylase                           |

|                       |      |                                                                        |
|-----------------------|------|------------------------------------------------------------------------|
| SPD_0037              | 1.90 | Hypothetical protein                                                   |
| SPD_1677              | 1.95 | <i>rafE</i> , Sugar ABC transporter, sugar-binding protein             |
| SPD_1982              | 1.95 | Hypothetical protein                                                   |
| intergenic            |      | Hypothetical protein                                                   |
| SPD_0131/<br>SPD_0132 | 2.01 |                                                                        |
| intergenic            |      | BOX elements                                                           |
| SPD_0048/<br>SPD_0049 | 2.08 |                                                                        |
| SPD_2028              | 2.22 | <i>cbpD</i> , Choline binding protein                                  |
| SPD_0898              | 2.27 | Membrane protein                                                       |
| SPD_0024              | 2.28 | <i>purA</i> , Adenylosuccinate synthetase                              |
| SPD_0047              | 2.29 | Hypothetical protein                                                   |
| SPD_0097              | 2.30 | Cyanate transporter                                                    |
| SPD_1124              | 2.38 | <i>licB</i> , Choline transport protein                                |
| SPD_1123              | 2.39 | <i>licC</i> , CTP-phosphocholine cytidylyltransferase                  |
| SPD_1126              | 2.42 | Alcohol dehydrogenase                                                  |
| SPD_0391              | 2.42 | Hypothetical protein                                                   |
| SPD_1125              | 2.49 | <i>pck</i> , Choline kinase                                            |
| SPD_1127              | 2.50 | <i>ispD</i> , 2-C-methyl-D-erythritol 4-phosphate cytidylyltransferase |
| SPD_0046              | 2.81 | <i>blpU</i> , Bacteriocin                                              |
| SPD_1122              | 3.04 | <i>dprA</i> , DNA processing protein                                   |
| SPD_0865              | 3.39 | <i>coiA</i> , Late competence protein                                  |
| SPD_1744              | 3.79 | <i>comM</i> , Immunity protein                                         |
| SPD_0466              | 4.12 | Hypothetical protein                                                   |
| SPD_0843              | 4.13 | <i>comEA</i> , Late competence protein, DNA receptor                   |
| SPD_0844              | 4.22 | <i>comEC</i> , Late competence protein, DNA transport                  |
| SPD_0014              | 4.34 | <i>comX1</i> , Competence-specific sigma factor                        |
| SPD_1855              | 4.53 | Hypothetical protein                                                   |
| SPD_1818              | 4.54 | <i>comX2</i> , Competence-specific sigma factor                        |
| SPD_2063              | 4.72 | <i>comE</i> , Response regulator                                       |
| SPD_1711              | 4.81 | <i>ssbB</i> , Single-strand DNA-binding protein                        |
| SPD_1856              | 4.82 | Hypothetical protein                                                   |
| SPD_0049              | 4.88 | <i>comA</i> , CSP ABC transporter ATP-binding protein/permease         |
| SPD_2064              | 5.00 | <i>comD</i> , Histidine sensor kinase                                  |
| SPD_0050              | 5.02 | <i>comB</i> , CSP ABC transporter permease                             |
| SPD_2065              | 5.08 | <i>comC</i> , CSP precursor                                            |
| SPD_1858              | 5.10 | <i>comGF</i> , Late competence protein, DNA uptake                     |
| SPD_1859              | 5.16 | Hypothetical protein                                                   |
| SPD_0473              | 5.17 | <i>blpY</i> , Immunity protein                                         |
| SPD_0475              | 5.19 | CAAX amino terminal protease family protein                            |
| SPD_0023              | 5.21 | <i>comW</i> , Competence positive regulator                            |
| SPD_1857              | 5.22 | <i>comGG</i> , Hypothetical protein                                    |
| SPD_1861              | 5.24 | <i>comGC</i> , Late competence protein, DNA uptake                     |
| SPD_1860              | 5.44 | <i>comGD</i> , Late competence protein, DNA uptake                     |

|          |      |                                                    |
|----------|------|----------------------------------------------------|
| SPD_1862 | 5.45 | <i>comGB</i> , Late competence protein, DNA uptake |
| SPD_1863 | 5.46 | <i>comGA</i> , Late competence protein, DNA uptake |
| SPD_0474 | 5.54 | <i>blpZ</i> , Immunity protein                     |
| SPD_2035 | 5.55 | <i>comFA</i> , Late competence protein, DNA uptake |
| SPD_2034 | 5.61 | <i>comFC</i> , Late competence protein, DNA uptake |
| SPD_0133 | 6.00 | <i>cibA</i> , Bacteriocin                          |
| SPD_0132 | 7.03 | <i>cibB</i> , Bacteriocin                          |

---

21 \*Gene expression was analyzed by RNA-Seq from RNA purified from three biological replicates  
22 of WT and  $\Delta pde1\Delta pde2$  strains. Fold change indicates the mean RNA reads of the  
23  $\Delta pde1\Delta pde2$  strain compared to those of WT.

24 **Table S2 Regulated genes in  $\Delta pde1\Delta pde2$  compared to CSP-induced genes determined**  
 25 **from a previous microarray study.<sup>a</sup>**

| <b>TIGR4<br/>Annotation</b> | <b>Regulation<sup>b</sup></b> | <b>Description</b>                                                 |
|-----------------------------|-------------------------------|--------------------------------------------------------------------|
| <i>Early</i>                |                               |                                                                    |
| SP0014                      | ↑                             | <i>comX1</i> , Competence-specific sigma factor                    |
| SP0018                      | ↑                             | <i>comW</i> , Competence positive regulator                        |
| SP0019                      | ↑                             | <i>purA</i> , Adenylosuccinate synthetase                          |
| SP0042                      | ↑                             | <i>comA</i> , CSP ABC transporter ATP-binding protein/permease     |
| SP0043                      | ↑                             | <i>comB</i> , CSP ABC transporter permease                         |
| SP0530                      | ↑                             | <i>blpA</i> , Bacteriocin ABC transporter ATP-binding protein      |
| SP0545                      | ↑                             | <i>blpY</i> , Immunity protein                                     |
| SP0546                      | ↑                             | <i>blpZ</i> , Immunity protein                                     |
| SP0547                      | ↑                             | CAAX amino terminal protease family protein                        |
| SP1110                      | ↑                             | <i>ribC</i> , Riboflavin kinase/FMN adenylyltransferase            |
| SP1549                      | ↑                             | Peptide deformylase                                                |
| SP1548                      | ↑                             | Hypothetical protein                                               |
| SP1717                      | -                             | ABC transporter ATP-binding protein                                |
| SP1716                      | -                             | Hypothetical protein                                               |
| SP1918                      | -                             | ABC transporter ATP-binding protein                                |
| SP1945                      | ↑                             | <i>comM</i> , Immunity protein                                     |
| SP1944                      | -                             | <i>tsaE</i> , tRNA threonylcarbamoyladenosine biosynthesis protein |
| SP1943                      | -                             | GNAT family acetyltransferase                                      |
| SP1942                      | -                             | LytR family transcriptional regulator                              |
| SP2006                      | ↑                             | <i>comX2</i> , Competence-specific sigma factor                    |
| SP2156                      | ↑                             | SPFH domain/Band 7 family                                          |
| SP2237                      | ↑                             | <i>comC</i> , CSP precursor                                        |
| SP2236                      | ↑                             | <i>comD</i> , Histidine sensor kinase                              |
| SP2235                      | ↑                             | <i>comE</i> , Response regulator                                   |
| <i>Delayed</i>              |                               |                                                                    |
| SP0338                      | ↑                             | <i>clpL</i> , ATP-dependent Clp protease ATP-binding subunit       |
| SP0515                      | ↑                             | <i>hrcA</i> , Heat-inducible transcription repressor               |
| SP0516                      | ↑                             | <i>grpE</i> , Heat shock protein/molecular chaperone               |
| SP0517                      | ↑                             | <i>dnaK</i> , Heat shock protein/molecular chaperone               |
| SP0519                      | -                             | <i>dnaJ</i> , Heat shock protein/molecular chaperone               |
| SP0785                      | -                             | HlyD family secretion protein                                      |
| SP0786                      | -                             | ABC transport system ATP-binding protein                           |
| SP0787                      | -                             | ABC transport system permease protein                              |
| SP0798                      | -                             | <i>ciaR</i> , Response regulator                                   |
| SP0799                      | -                             | <i>ciaH</i> , Histidine sensor kinase                              |
| SP1027                      | ↓                             | Hypothetical protein                                               |
| SP1029                      | -                             | TrmA family RNA methyltransferase                                  |

|             |   |                                                   |
|-------------|---|---------------------------------------------------|
| SP1380      | - | ABC transport system permease protein             |
| SP1714      | ↓ | GntR transcriptional regulator                    |
| SP1715      | ↓ | ATP transporter ATP-binding protein               |
| SP1907      | - | <i>groES</i> , Chaperonin                         |
| SP1906      | - | <i>groEL</i> , Chaperonin                         |
| SP2239      | ↓ | <i>htrA</i> , Serine protease                     |
| SP2240      | ↓ | <i>spoJ</i> , Chromosome partitioning protein     |
| <i>Late</i> |   |                                                   |
| SP0021      | ↑ | dUTP pyrophosphatase                              |
| SP0022      | ↑ | Hypothetical protein                              |
| SP0023      | ↑ | <i>radA</i> , DNA repair protein                  |
| SP0024      | - | Carbonic anhydrase                                |
| SP0025      | - | Hypothetical protein                              |
| SP0026      | - | Hypothetical protein                              |
| SP0031      | ↑ | Hypothetical protein                              |
| SP0030      | ↑ | <i>ccs16</i> , Competence-induced protein         |
| SP0029      | ↑ | Hypothetical protein                              |
| SP0125      | ↑ | <i>cibA</i> , Bacteriocin                         |
| SP0124      | ↑ | <i>cibB</i> , Bacteriocin                         |
| SP0200      | - | <i>ccs4</i> , Competence-induced protein          |
| SP0201      | - | Hypothetical protein                              |
| SP0782      | - | Hypothetical protein                              |
| SP0954      | ↑ | <i>ceIA</i> , Competence-related DNA transporter  |
| SP0955      | ↑ | <i>ceIB</i> , Competence-related DNA transporter  |
| SP0956      | ↑ | Hypothetical protein                              |
| SP0957      | ↑ | ABC transporter ATP-binding protein               |
| SP0958      | ↑ | ABC transport permease protein                    |
| SP0978      | ↑ | <i>coiA</i> , Late competence protein             |
| SP0979      | - | <i>pepF</i> , Oligoendopeptidase                  |
| SP0980      | - | O-methyltransferase                               |
| SP0981      | - | <i>cpoA</i> , Glycosyl transferase                |
| SP1065      | - | Hypothetical protein                              |
| SP1071      | - | <i>dnaG</i> , DNA primase                         |
| SP1073      | - | <i>rpoD</i> , Sigma factor                        |
| SP1074      | - | Hypothetical protein                              |
| SP1096      | - | Hypothetical protein                              |
| SP1095      | - | <i>prsA2</i> , Ribose-phosphate pyrophosphokinase |
| SP1094      | - | Cysteine desulfurase                              |
| SP1093      | - | Hypothetical protein                              |
| SP1092      | - | Hypothetical protein                              |
| SP1090      | - | Redox-sensing transcriptional repressor           |
| SP1089      | - | Glutamine amidotransferase                        |
| SP1088      | - | <i>radC</i> , DNA repair protein                  |
| SP1097      | - | GTP pyrophosphokinase                             |
| SP1098      | - | NAD <sup>+</sup> kinase                           |

|        |   |                                                               |
|--------|---|---------------------------------------------------------------|
| SP1099 | - | Ribosomal large subunit pseudouridine synthase                |
| SP1100 | - | <i>ptA</i> , Phosphate acetyltransferase                      |
| SP1266 | ↑ | <i>dprA</i> , DNA processing protein                          |
| SP1264 | - | Hypothetical protein                                          |
| SP1480 | - | Hypothetical protein                                          |
| SP1479 | - | <i>pgdA</i> , Peptidoglycan N-acetylglucosamine deacetylase A |
| SP1478 | - | Oxidoreductase                                                |
| SP1808 | ↑ | <i>cclA</i> , Type IV prepilin peptidase                      |
| SP1809 | - | Transcriptional regulator                                     |
| SP1810 | - | Hypothetical protein                                          |
| SP1811 | - | <i>trpA</i> , Tryptophan synthase alpha chain                 |
| SP1897 | ↑ | <i>rafE</i> , Sugar ABC transporter, sugar-binding protein    |
| SP1908 | ↑ | <i>ssbB</i> , Single-strand DNA-binding protein               |
| SP1941 | ↑ | <i>cinA</i> , Competence nicotinamide-nucleotide amidase      |
| SP1940 | - | <i>recA</i> , Recombinase                                     |
| SP1939 | - | <i>dinF</i> , MATE efflux family protein                      |
| SP1937 | - | <i>lytA</i> , Autolysin/N-acetylmuramoyl-L-alanine amidase    |
| SP1981 | - | <i>ccs50</i> , DNA recombination protein                      |
| SP1980 | - | <i>cbf1</i> , 3'-5' exoribonuclease                           |
| SP2019 | ↑ | ABC transporter ATP-binding protein                           |
| SP2018 | - | Transposase                                                   |
| SP2017 | - | Membrane protein                                              |
| SP2016 | - | <i>nadC</i> , Nicotinate-nucleotide pyrophosphorylase         |
| SP2015 | - | Transposase                                                   |
| SP2014 | - | Transposase                                                   |
| SP2013 | - | Hypothetical protein                                          |
| SP2053 | ↑ | <i>cgIA</i> , Late competence protein, DNA uptake             |
| SP2052 | ↑ | <i>cgIB</i> , Late competence protein, DNA uptake             |
| SP2051 | ↑ | <i>cgIC</i> , Late competence protein, DNA uptake             |
| SP2050 | ↑ | <i>cgID</i> , Late competence protein, DNA uptake             |
| SP2049 | ↑ | <i>cgIE</i> , Hypothetical protein                            |
| SP2048 | ↑ | <i>comGF</i> , Late competence protein, DNA uptake            |
| SP2047 | ↑ | <i>comGG</i> , Hypothetical protein                           |
| SP2046 | ↑ | Pseudogene                                                    |
| SP2045 | ↑ | DNA-methyltransferase                                         |
| SP2201 | ↑ | <i>cbpD</i> , Choline binding protein                         |
| SP2200 | - | Hypothetical protein                                          |
| SP2199 | - | Hypothetical protein                                          |
| SP2198 | - | ABC transporter permease protein                              |
| SP2197 | - | ABC transporter substrate-binding protein                     |
| SP2196 | - | ABC transporter ATP-binding protein                           |
| SP2208 | ↑ | <i>cflA</i> , Late competence protein, helicase               |
| SP2207 | ↑ | <i>cflB</i> , Late competence protein, DNA uptake             |
| SP2206 | - | <i>yfiA</i> , Ribosomal subunit interface protein             |

---



26 <sup>a</sup>In a previous study performed by Peterson *et al.* (S.N. Peterson, C.K. Sung, R. Cline, B.V.  
27 Desai, E.C. Snesrud, Luo P, J. Walling, H. Li, M. Mintz, G. Tsegaye, P.C. Burr, Y. Do, S. Ahn, J.  
28 Gilbert, R.D. Fleischmann, D.A. Morrison. *Mol Microbiol* 51:1051-70, 2004), upregulated genes  
29 were detected by microarray in *S. pneumoniae* TIGR4 after CSP induction. These genes were  
30 annotated as early, delayed, or late competence genes.

31 <sup>b</sup>From our study, genes that were significantly upregulated (↑), downregulated (↓), or not  
32 regulated (-) in  $\Delta pde1\Delta pde2$  strain compared to WT are shown.

33 **Table S3 Transformation efficiencies of WT and  $\Delta trkH$  strains with a modified**  
 34 **transformation protocol<sup>a</sup>.**

| [KCl]<br>(mM) | WT                |                   |                         | $\Delta trkH$     |                   |                        |
|---------------|-------------------|-------------------|-------------------------|-------------------|-------------------|------------------------|
|               | Input             | Output            | Efficiency <sup>b</sup> | Input             | Output            | Efficiency             |
| <b>0</b>      | $4.0 \times 10^7$ | UD                | $< 2.5 \times 10^{-8}$  | $2.3 \times 10^7$ | UD                | $< 4.3 \times 10^{-8}$ |
| <b>1</b>      | $8.1 \times 10^7$ | $5.6 \times 10^3$ | $6.9 \times 10^{-5}$    | $2.5 \times 10^7$ | UD                | $< 4.0 \times 10^{-8}$ |
| <b>10</b>     | $6.8 \times 10^7$ | $6.8 \times 10^3$ | $1.0 \times 10^{-4}$    | $6.2 \times 10^7$ | $3.3 \times 10^3$ | $5.3 \times 10^{-5}$   |

35 <sup>a</sup>Pneumococcal stocks were inoculated in THY media instead of THYI. Bacteria were washed in  
 36 K<sup>+</sup>-free CDM and then transformed with plasmid pVA838 in CDM with indicated concentration of  
 37 KCl as described in Methods.

38 <sup>b</sup>Transformation efficiency for each individual experiment was calculated as output/input. The  
 39 values shown in the table are the averages of three independent biological replicates. UD,  
 40 Under the level of detection limit. In experiments that yielded no transformants, the efficiency  
 41 limits were calculated using the output as one.

42 **Table S4 Bacterial strains and plasmids used in this study.**

| Strain                           | Description <sup>a</sup>                                                  | Source           |
|----------------------------------|---------------------------------------------------------------------------|------------------|
| <i>S. pneumoniae</i>             |                                                                           |                  |
| D39                              | <i>S. pneumoniae</i> serotype 2                                           | (1)              |
| ST581                            | D39 derivative; Strep <sup>r</sup>                                        | (2)              |
| ST2729                           | ST581 $\Delta pde1$ ; Strep <sup>r</sup>                                  | (2)              |
| ST2733                           | ST581 $\Delta pde2$ ; Strep <sup>r</sup>                                  | (2)              |
| ST2734                           | ST581 $\Delta pde1 \Delta pde2$ ; Strep <sup>r</sup>                      | (2)              |
| ST3275                           | ST581 $\Delta comA::Janus$ ; Kan <sup>r</sup>                             | This study       |
| ST3293                           | ST581 $\Delta bgaA::cdaA^+$ Janus (pST3286); Kan <sup>r</sup>             | This study       |
| ST3313                           | ST3293 $\Delta bgaA::cdaA^+$ ; Strep <sup>r</sup>                         | This study       |
| ST3334                           | ST3313 $\Delta cdaA::Janus$ ; Kan <sup>r</sup>                            | This study       |
| ST3405                           | ST3334 <i>cdaA*</i> ; Strep <sup>r</sup>                                  | This study       |
| ST3406                           | ST3405 $\Delta bgaA::Janus$ ; Kan <sup>r</sup>                            | This study       |
| ST3409                           | ST3406 <i>bgaA</i> ; Strep <sup>r</sup>                                   | This study       |
| ST3444                           | ST2734 <i>cdaA-32</i> ; Strep <sup>r</sup>                                | (3)              |
| ST3466                           | ST3409 $\Delta bgaA::Janus$ ; Kan <sup>r</sup>                            | This study       |
| ST3467                           | ST3409 $\Delta bgaA::cdaA^+$ Janus (pST3286); Kan <sup>r</sup>            | This study       |
| ST3478                           | ST581 $\Delta comD::Janus$ ; Kan <sup>r</sup>                             | This study       |
| ST3479                           | ST3409 $\Delta comD::Janus$ ; Kan <sup>r</sup>                            | This study       |
| ST3480                           | ST3409 $\Delta comA::Janus$ ; Kan <sup>r</sup>                            | This study       |
| ST3519                           | ST3409 $\Delta trkH \Delta cabP::Janus$ ; Kan <sup>r</sup>                | This study       |
| ST3520                           | ST3409 $\Delta trkA \Delta trkG::Janus$ ; Kan <sup>r</sup>                | This study       |
| HSR1                             | ST2734 <i>cdaA*</i> (suppressor); Strep <sup>r</sup>                      | (3)              |
| <i>E. coli</i>                   |                                                                           |                  |
| DH5 $\alpha$                     | <i>E. coli</i> strain used for cloning                                    | Laboratory stock |
| <b>Plasmid</b>                   |                                                                           |                  |
| <i>Transformation efficiency</i> |                                                                           |                  |
| pVA838                           | <i>S. pneumoniae</i> expression vector; Erm <sup>r</sup>                  | (4)              |
| <i>Constructing cdaA*</i>        |                                                                           |                  |
| pBluescript SK (-)               | Vector used for cloning; Ap <sup>r</sup>                                  | Stratagene       |
| pUC19                            | Vector used for cloning; Ap <sup>r</sup>                                  | NEB              |
| pST3167                          | pBluescript + upstream <i>bgaA</i> ; Ap <sup>r</sup>                      | This study       |
| pST3172                          | pST3167 + downstream <i>bgaA</i> ; Ap <sup>r</sup>                        | This study       |
| pST3222                          | pST3172 + Janus; Ap <sup>r</sup> Kan <sup>r</sup>                         | This study       |
| pST3277                          | pUC19 + pBluescript <i>bgaA</i> + Janus; Ap <sup>r</sup> Kan <sup>r</sup> | This study       |
| pST3286                          | pST3277 + <i>cdaA</i> ; Ap <sup>r</sup> Kan <sup>r</sup>                  | This study       |
| <i>Promoter-reporter</i>         |                                                                           |                  |
| pST1556                          | pPP2; Ap <sup>r</sup>                                                     | (5)              |
| pST2868                          | pPP2-erm; Ap <sup>r</sup> Erm <sup>r</sup>                                | (3)              |
| pST2885                          | pPP2-erm: P' <i>gyrA</i> ; Ap <sup>r</sup> Erm <sup>r</sup>               | (3)              |
| pST3302                          | pPP2-erm: P' <i>ssbB</i> ; Ap <sup>r</sup> Erm <sup>r</sup>               | This study       |

43 <sup>a</sup>Ap<sup>r</sup>, ampicillin resistance; Erm<sup>r</sup>, erythromycin resistance; Kan<sup>r</sup>, kanamycin resistance; Strep<sup>r</sup>,

44 streptomycin resistance.

45 Table S5 Primers used in this study\*.

| Primer | Sequence 5'→3'                      | Restriction site | Location*        | Application                  |
|--------|-------------------------------------|------------------|------------------|------------------------------|
| Pr1097 | gagatctagaaccgtttgatttttaatggataatg | XbaI             | F Janus          | Generate mutant              |
| Pr1098 | gagactcgagcctttccttatgcttttgac      | XhoI             | R Janus          | Generate mutant              |
| Pr2084 | ttgaaattatggatactgagatgc            | -                | up <i>comA</i>   | Generate mutant              |
| Pr2085 | aactctagactaatgaagctacaccgcagtc     | XbaI             | up <i>comA</i>   | Generate mutant              |
| Pr2086 | atcgctcgagggtcaatagctagaaagaggagag  | XhoI             | down <i>comA</i> | Generate mutant              |
| Pr2087 | gaagcaccatcctcact                   | -                | down <i>comA</i> | Generate mutant              |
| Pr2874 | tgacgataatctgtgacgg                 | -                | up <i>cdaA</i>   | Generate <i>cdaA</i> *       |
| Pr2877 | ccctgaaatacgtgtgtcac                | -                | down <i>cdaA</i> | Generate <i>cdaA</i> *       |
| Pr2879 | tttgatccacaagcaaaaagagtgagg         | BamHI            | R <i>cdaA</i>    | Generate <i>cdaA</i> *       |
| Pr2973 | tttctgacctgagaccgctcat              | -                | down <i>cabP</i> | Generate mutant              |
| Pr2976 | tttgatgaggagccagttacca              | -                | up <i>trkH</i>   | Generate mutant              |
| Pr2994 | ggaacctggtgatagcc                   | -                | up <i>trkA</i>   | Generate mutant              |
| Pr3001 | cattctgtagagcgtatgatagac            | -                | down <i>trkG</i> | Generate mutant              |
| Pr3181 | gcagggtttctcctctacgc                | -                | <i>comGG</i>     | qRT-PCR                      |
| Pr3182 | tccccactttcttgctcaac                | -                | <i>comGG</i>     | qRT-PCR                      |
| Pr3183 | ggcagcaggcttgagtac                  | -                | <i>comFC</i>     | qRT-PCR                      |
| Pr3184 | cggcttctccaacagtttc                 | -                | <i>comFC</i>     | qRT-PCR                      |
| Pr3187 | ccggggtgaagttgactaaa                | -                | <i>comA</i>      | qRT-PCR                      |
| Pr3188 | agccacgctgcttactaat                 | -                | <i>comA</i>      | qRT-PCR                      |
| Pr3189 | acagagcaagcagacagcaa                | -                | <i>comEA</i>     | qRT-PCR                      |
| Pr3190 | tgtcctgagctcgtttcct                 | -                | <i>comEA</i>     | qRT-PCR                      |
| Pr3195 | tgccaagcgtactacgacag                | -                | <i>radA</i>      | qRT-PCR                      |
| Pr3196 | tctctctgtcaagcccagt                 | -                | <i>radA</i>      | qRT-PCR                      |
| Pr3197 | ggacaacgtttcggtgagat                | -                | <i>rpoB</i>      | qRT-PCR                      |
| Pr3198 | tcggaaggattctggaacac                | -                | <i>rpoB</i>      | qRT-PCR                      |
| Pr3199 | gttcgcaattcctgcaaat                 | -                | <i>htrA</i>      | qRT-PCR                      |
| Pr3200 | ccgaacgaacaattacacca                | -                | <i>htrA</i>      | qRT-PCR                      |
| Pr3332 | ttgggtaccaaattcaatatcgggtctgac      | KpnI             | up <i>bgaA</i>   | Generate integrative plasmid |
| Pr3333 | ggtctcgagcattgagtttatatttatagg      | XhoI             | up <i>bgaA</i>   | Generate integrative         |

|        |                                               |       |                                   |                              |
|--------|-----------------------------------------------|-------|-----------------------------------|------------------------------|
|        |                                               |       |                                   | plasmid                      |
| Pr3334 | ttgcggccggttgatttttaatggataatg                | EagI  | F Janus                           | Generate integrative plasmid |
| Pr3335 | gggccgcccccttccttatgcttttgac                  | SacII | R Janus                           | Generate integrative plasmid |
| Pr3336 | agtcgcggttagataagactgacg                      | SacI  | down <i>bgaA</i>                  | Generate integrative plasmid |
| Pr3337 | ccggagctcctaggttcactttgttctg                  | SacII | down <i>bgaA</i>                  | Generate integrative plasmid |
| Pr3342 | cttcaattgatgtcagatcgtagattgg                  | Sall  | F P' <i>cdaA</i>                  | Generate <i>cdaA</i> *       |
| Pr3404 | ccggcatgcctaggttcactttgttctg                  | SphI  | down <i>bgaA</i>                  | Generate integrative plasmid |
| Pr3421 | ctcaggatattgcagacac                           | EcoRI | F P' <i>ssbB</i>                  | Promoter-reporter            |
| Pr3422 | ctggtgtagacgttaaacgc                          | BamHI | R P' <i>ssbB</i>                  | Promoter-reporter            |
| Pr3434 | ttccgcggaagcaaaaaagagtgagg                    | SacII | R <i>cdaA</i>                     | Generate <i>cdaA</i> *       |
| Pr3470 | cattatccattaaaaatcaaacggttgatagctatcgccatgg   | -     | F Janus-<br>R up<br><i>cdaA</i>   | Generate <i>cdaA</i> *       |
| Pr3471 | ccatggacgatagctatcaaccggttgatttttaatggataatg  | -     | R up<br><i>cdaA</i> -F<br>Janus   | Generate <i>cdaA</i> *       |
| Pr3472 | tcctagcaatcgctctttaaagagccttccttatgcttttgac   | -     | F down<br><i>cdaA</i> -R<br>Janus | Generate <i>cdaA</i> *       |
| Pr3473 | gtccaaaagcataaggaaaggctctttaaagaacgattgctagga | -     | R Janus-<br>F down<br><i>cdaA</i> | Generate <i>cdaA</i> *       |
| Pr3529 | tgggggaagtttaggattgtc                         | -     | up <i>comD</i>                    | Generate mutant              |
| Pr3530 | tggctagatccaataaatccattactcttcc               | XbaI  | up <i>comD</i>                    | Generate mutant              |
| Pr3531 | tggctcgagttaagaggaattgaaag                    | XhoI  | down <i>comD</i>                  | Generate mutant              |
| Pr3532 | ccaaaaatgacttgtaggaga                         | -     | down <i>comD</i>                  | Generate mutant              |

46 \*F, forward primer of the ORF; R, reverse primer of the ORF; up, upstream arm of the gene;

47 down, downstream arm of the gene.

48

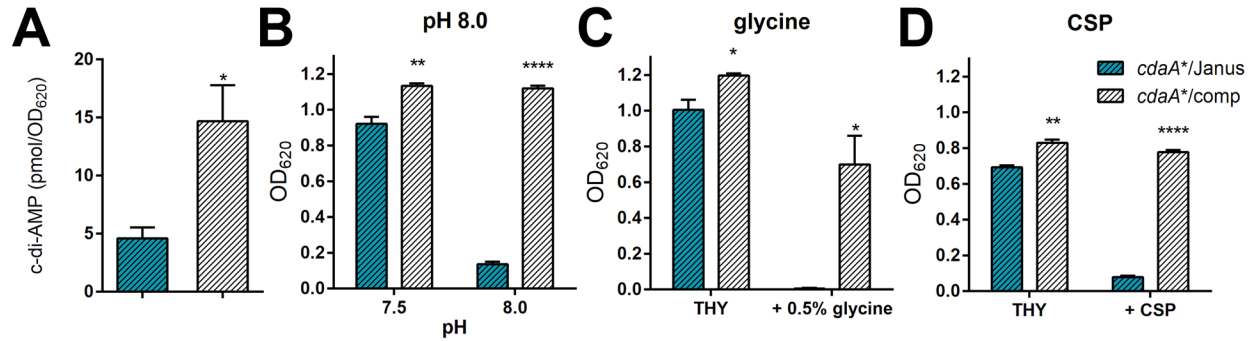

49

50 **FIG S1 Complementation of the *cdaA\** strain by introduction of native *cdaA* at the *bgaA***

51 **locus.** The low c-di-AMP-producing strain, *cdaA\**, was transformed with integrative plasmids as

52 described in Methods to introduce either Janus cassette (*cdaA\*/Janus*) or with the native *cdaA*

53 (complemented, *cdaA\*/comp*) at the *bgaA* locus. (A) Determination of c-di-AMP levels in

54 *cdaA\*/Janus* and *cdaA\*/comp*. These strains were assayed for growth in THY (pH 7.5) or THY

55 adjusted to pH 8.0 (B), with the addition of 0.5% glycine (C), or with the addition of 375 ng·mL<sup>-1</sup>

56 CSP (D). Bacterial growth was measured at OD<sub>620</sub> after 10 h. Data shown are the means and

57 SEMs from three independent replicate experiments.

58

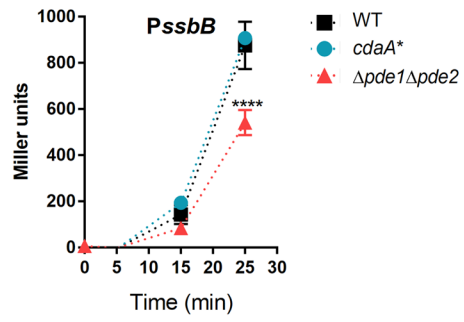

59

60 **FIG S2 Initiation of the competence state in WT,  $\Delta pde1\Delta pde2$ , and *cdaA\**.** Promoter activity  
61 of *ssbB* was monitored at 0, 5, 15, and 25 min after CSP addition. Data shown are the means  
62 and SEMs from three independent replicate experiments.

63

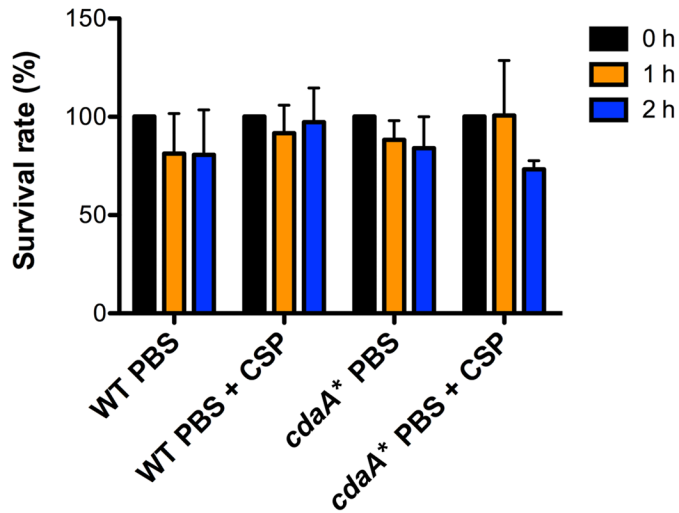

64

65 **FIG S3 Incubation of *cdaA\** in PBS in the presence or absence of 375 ng·mL<sup>-1</sup> CSP.** WT  
 66 and *cdaA\** were grown in THY an OD<sub>620</sub> of 0.05. Bacteria in 200 μL culture were harvested and  
 67 resuspended in 200 μL PBS either in the presence or absence of 375 ng·mL<sup>-1</sup> CSP followed by  
 68 incubation at 37°C. At 0, 1, and 2 h of incubation, dilutions were prepared and spread on TSA  
 69 blood agar plates to determined CFU. The survival rate at 0 h was set as 100%, which is used  
 70 to normalize the rate after 1 and 2 h. Data shown are the means and SEMs from three  
 71 independent replicate experiments.
